# Supplementary material
Source: publisher site journal article supplement (https://www.dovepress.com/article/426481)
Supplement: Supplementary file 1 [file get_supplementary_file.php]

**Supplementary Information**

| Supplementary Table1 Details of searches in each database | | |
| --- | --- | --- |
| Database | Search strategy | Records |
| PubMed | ("schizophrenia"[MeSH Terms] OR "schizophrenia"[All Fields] OR "schizophrenias"[All Fields] OR "schizophrenia s"[All Fields] OR "schizophrenic Disorders"[All Fields OR "schizophrenic"[All Fields) AND ("3 carboxamido 4 hydroxynaltrexone"[Supplementary Concept] OR "3 carboxamido 4 hydroxynaltrexone"[All Fields] OR "samidorphan"[All Fields]) | 42 |
| Web of Science | samidorphan (Topic) and schizophrenia* (Topic) and Preprint Citation Index (Exclude – Database) | 66 |
| Cochrane Library | samidorphan in Title Abstract Keyword AND schizophrenia in Title Abstract Keyword | 52 |
| Embase | ('samidorphan'/exp OR samidorphan) AND olanzapine AND schizophrenia | 70 |
| CNKI | (''Lybalvi'' OR "Samidorphan") AND ''schizophrenia'')) | 1 |
| Wanfang | (''Lybalvi'' OR "Samidorphan") AND ''schizophrenia'')) | 2 |
|  |
| VIP | (''Lybalvi'' OR "Samidorphan") AND ''schizophrenia'')) | 2 |  |
|  |
| CBM | (''Lybalvi'' OR "Samidorphan") AND ''schizophrenia'')) | 2 |  |
| Note: Literature search was conducted on 31 May, 2023. CBM, Chinese Biology Medicine; CNKI, China National Knowledge Infrastructure. | | |  |

Supplementary Figures 1-14: Estimating Reporting Bias with Funnel Plots

**
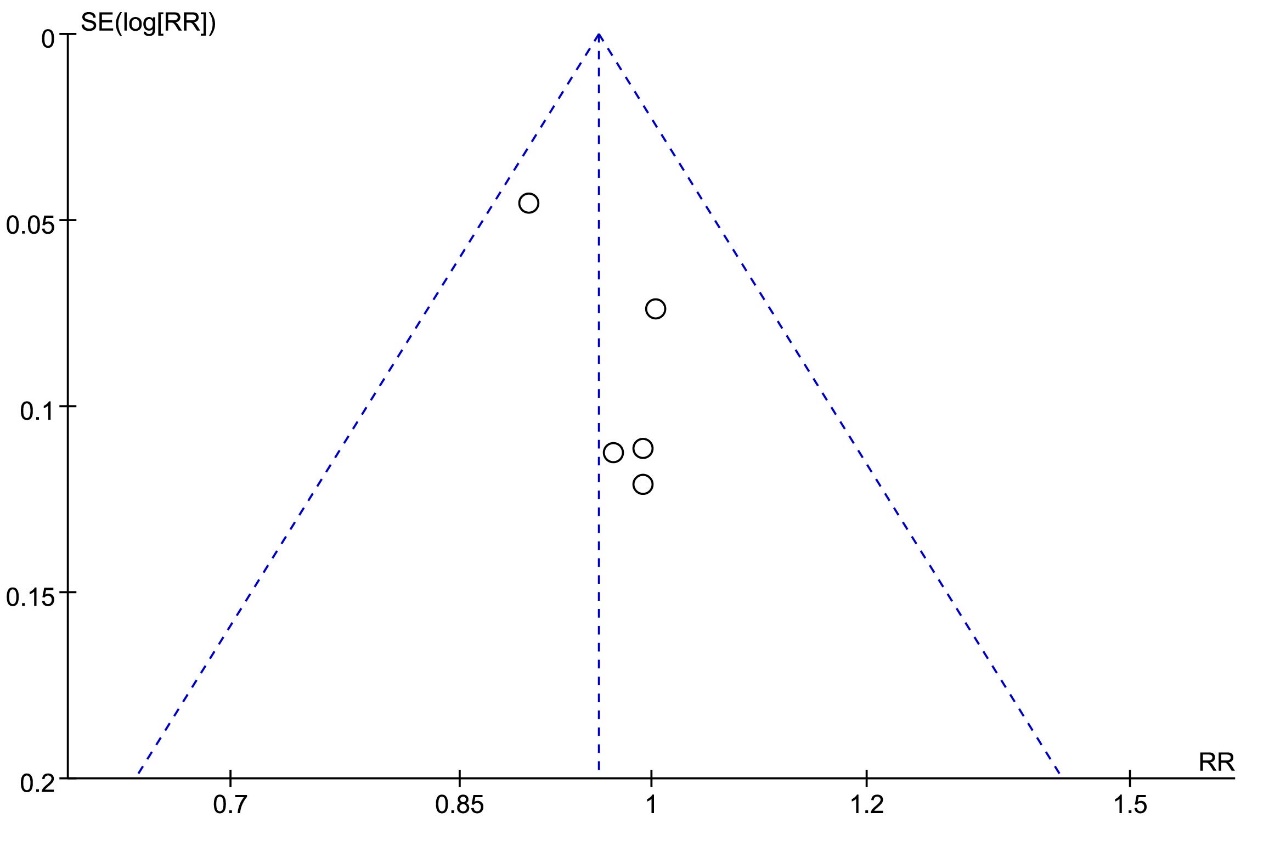
** Supplementary Figure1 Funnel plot: assessing the publication bias of the incidence of any adverse events

**
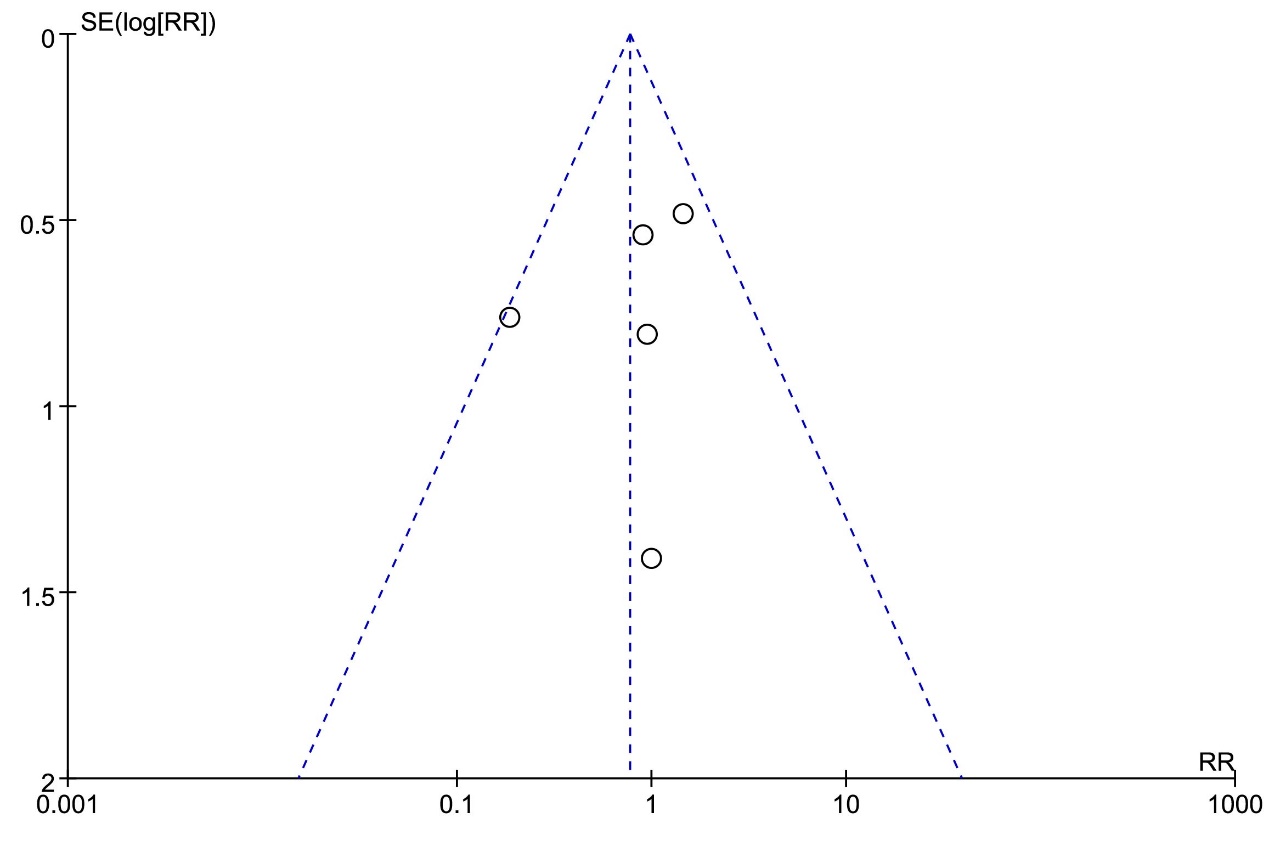
** Supplementary Figure2 Funnel plot: assessing the publication bias of the incidence of serious adverse events


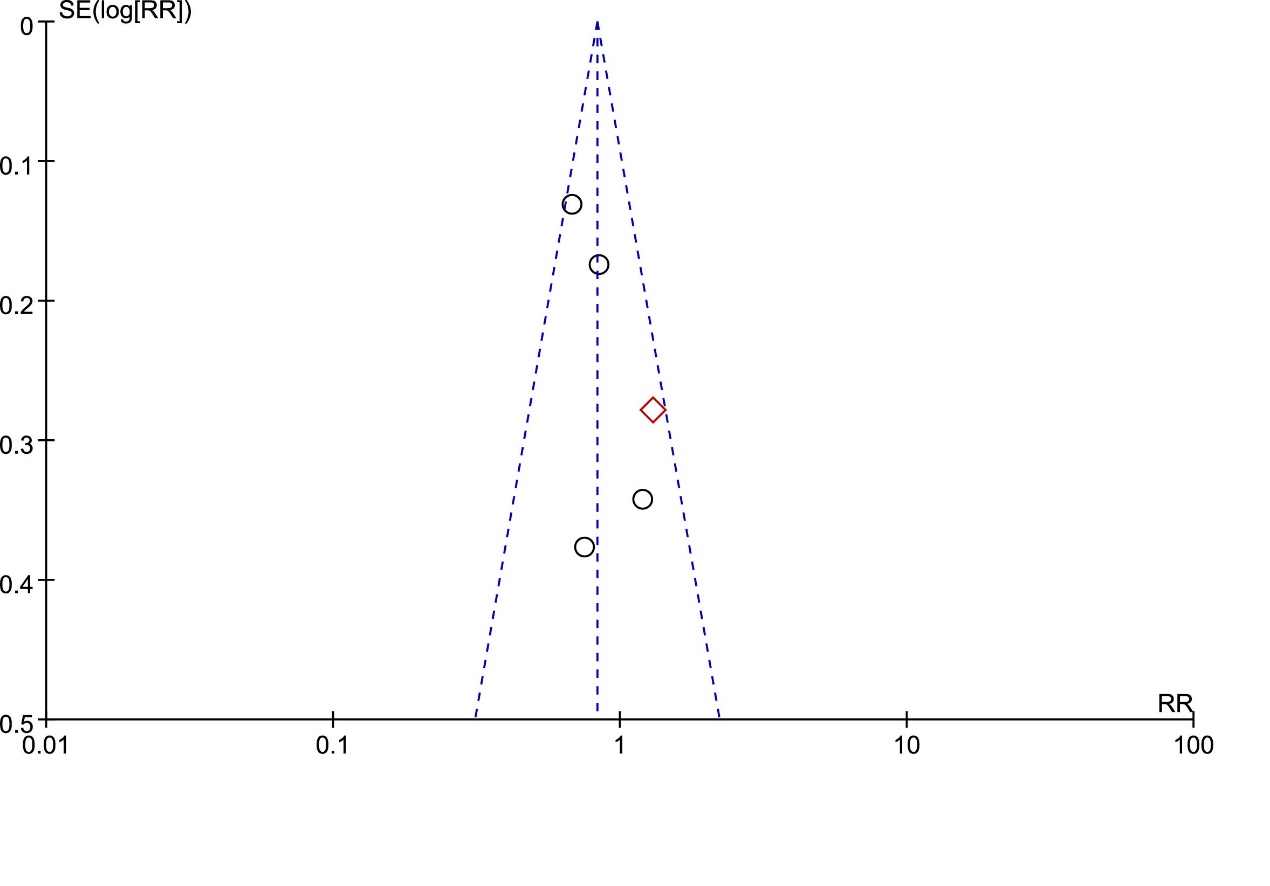
 Supplementary Figure3 Funnel plot: assessing the publication bias of the incidence of weight gain

In terms of adverse events related to weight gain, subgroup analysis was conducted. The ◇ symbol represents the short follow-up time group, while the ○ symbol represents the long follow-up time group.


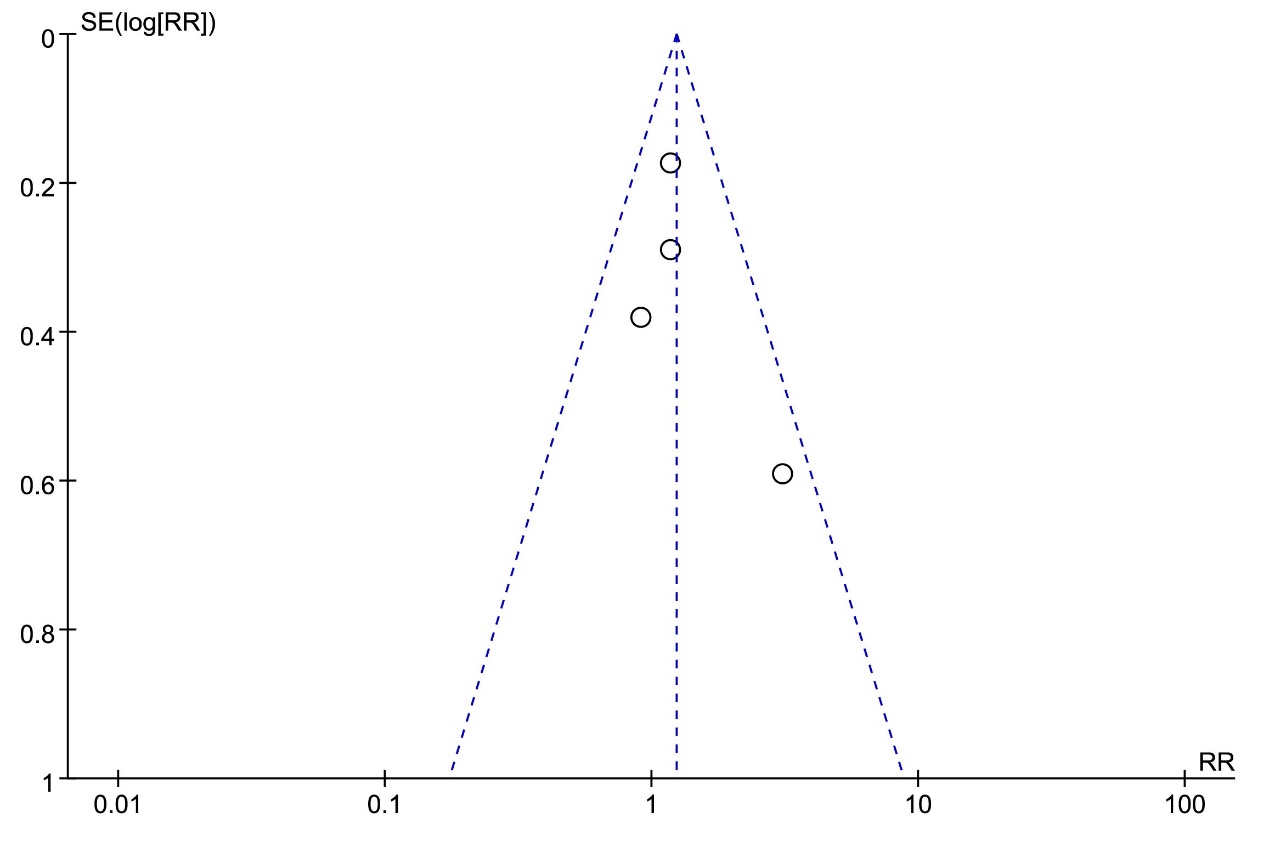
 Supplementary Figure4 Funnel plot: assessing the publication bias of the incidence of somnolence


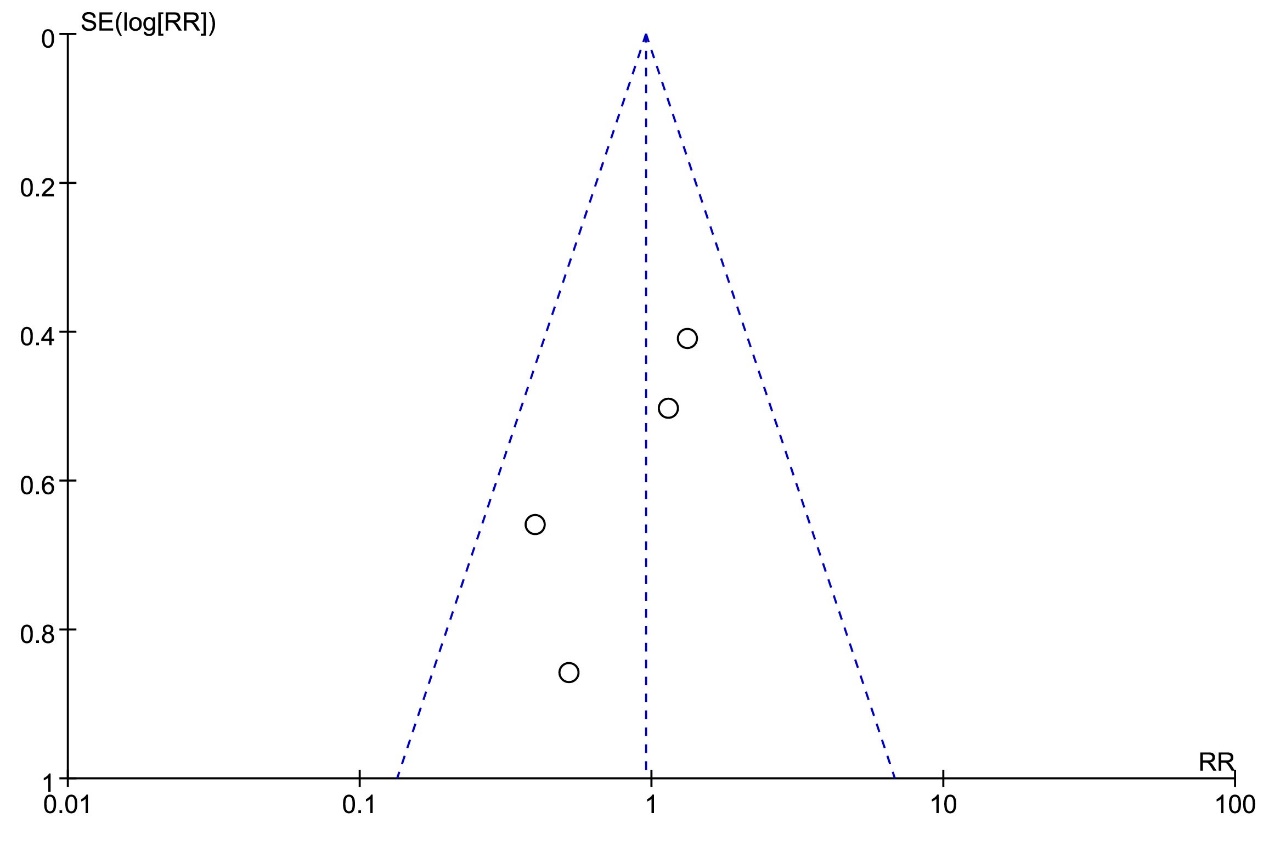
 Supplementary Figure5 Funnel plot: assessing the publication bias of the incidence of headache


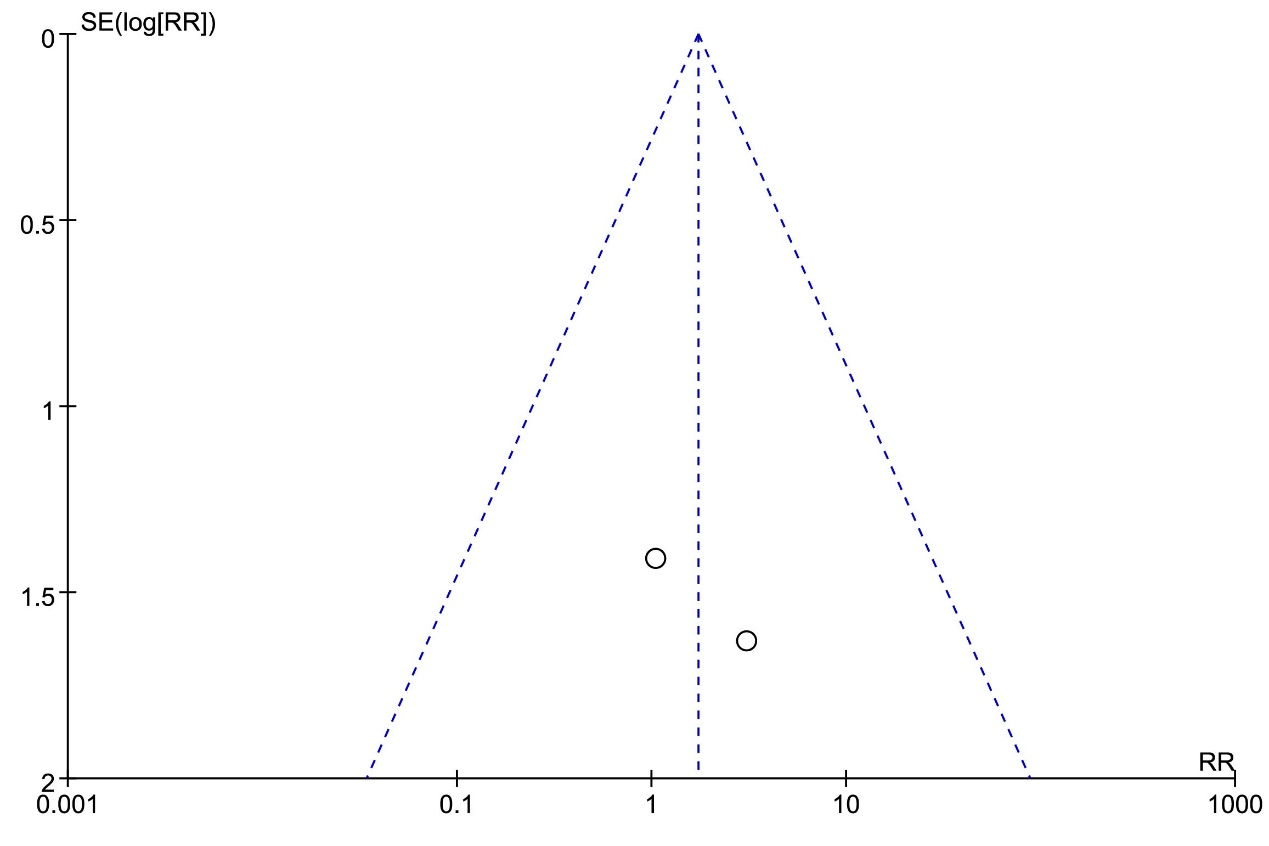
 Supplementary Figure6 Funnel plot: assessing the publication bias of the incidence of death


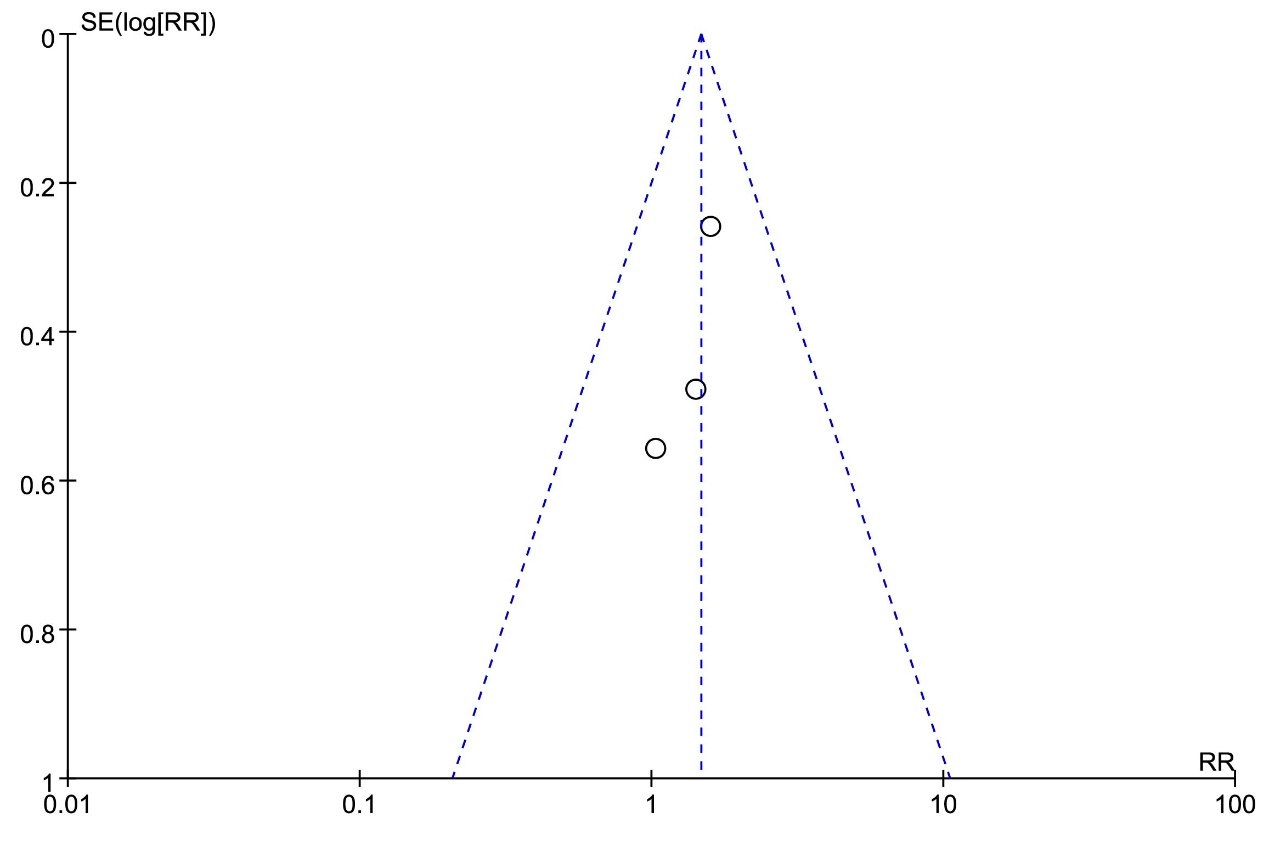
 Supplementary Figure7 Funnel plot: assessing the publication bias of the incidence of dry mouth


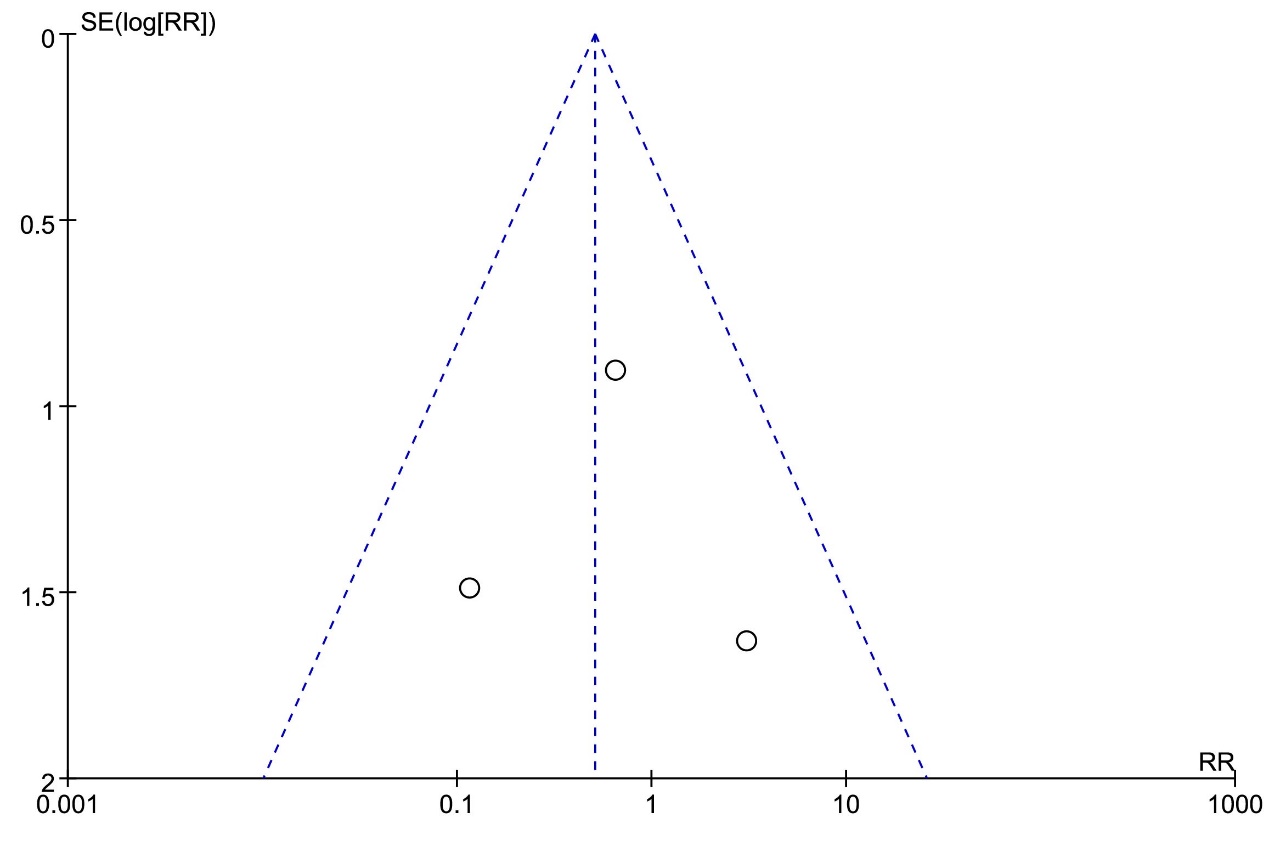
 Supplementary Figure8 Funnel plot: assessing the publication bias of the incidence of suicide perception


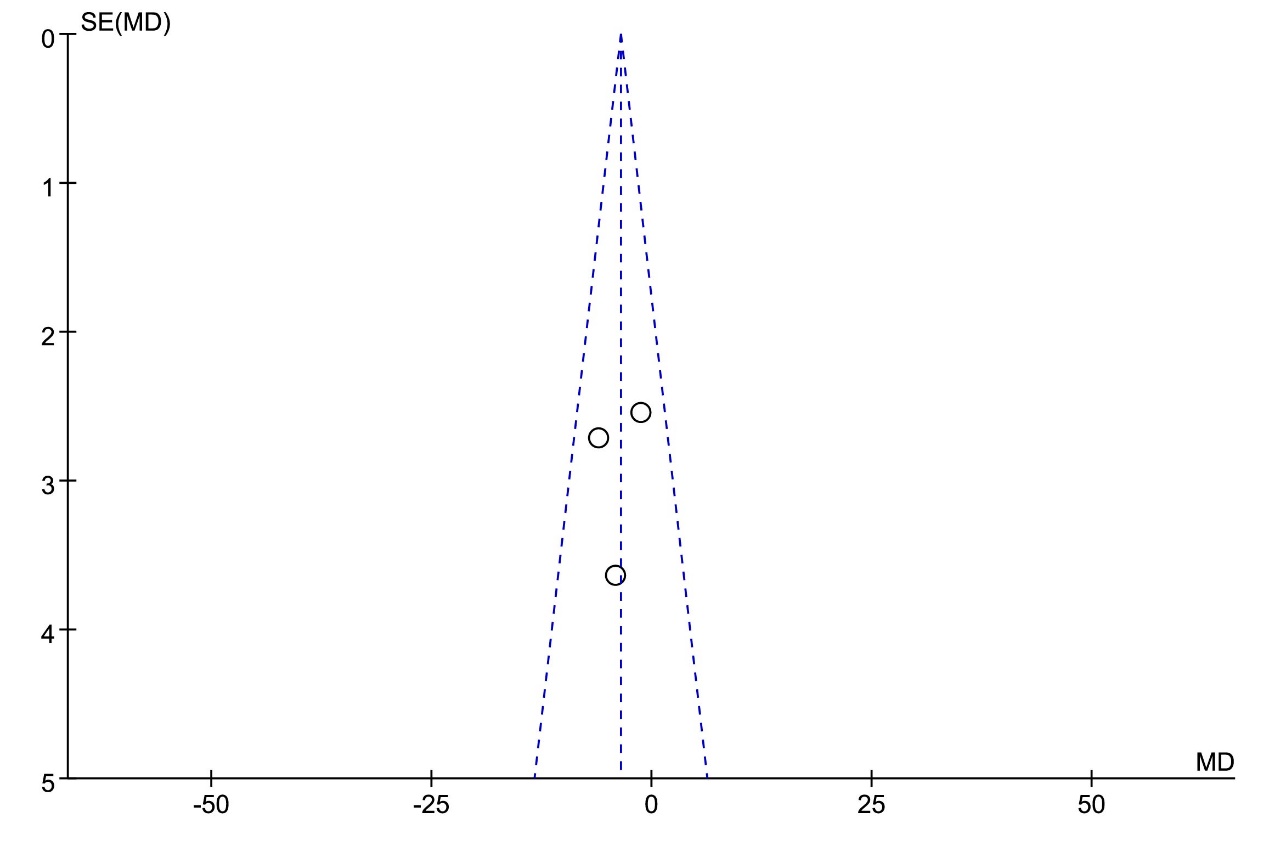
 Supplementary Figure9 Funnel plot: assessing the publication bias of total cholesterol (mg/dL)


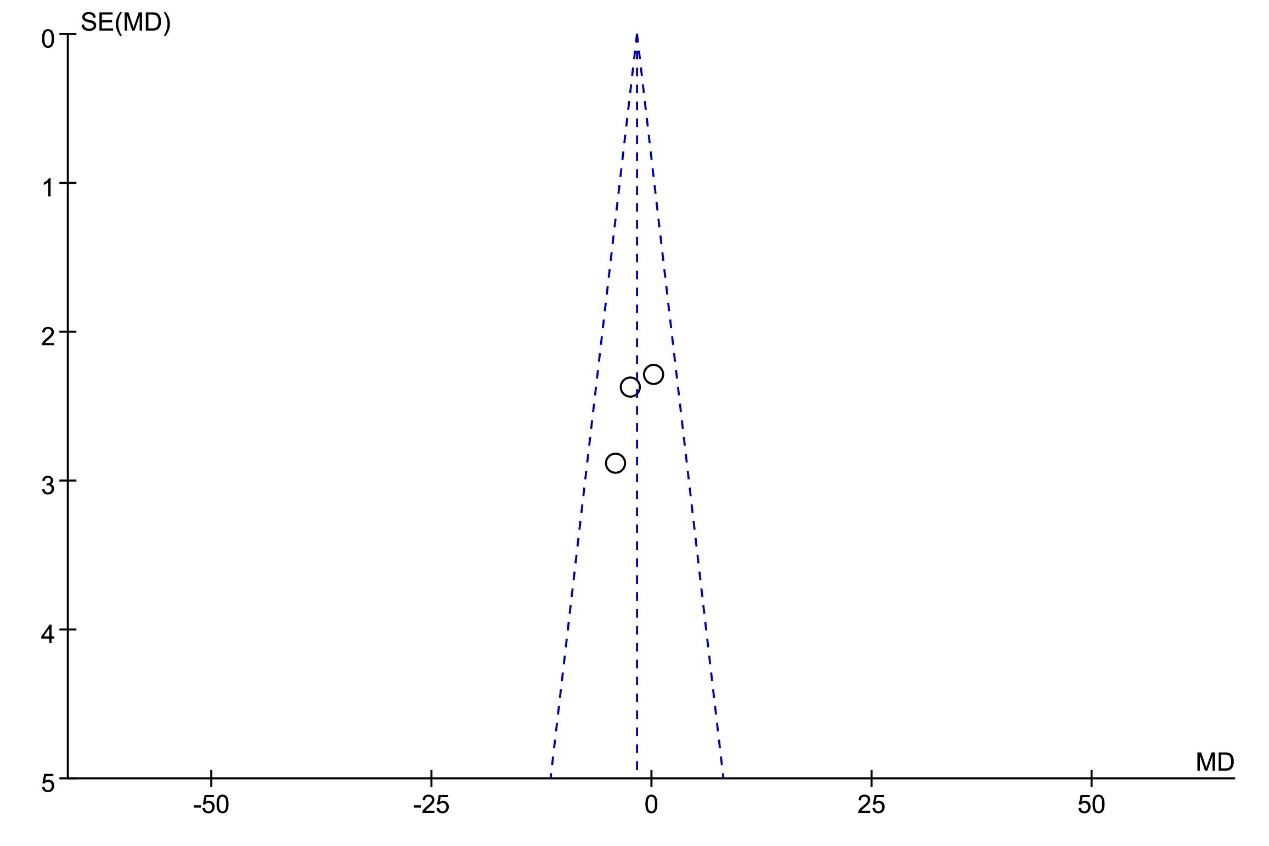
 Supplementary Figure10 Funnel plot: assessing the publication bias of low density lipoprotein (mg/dL)


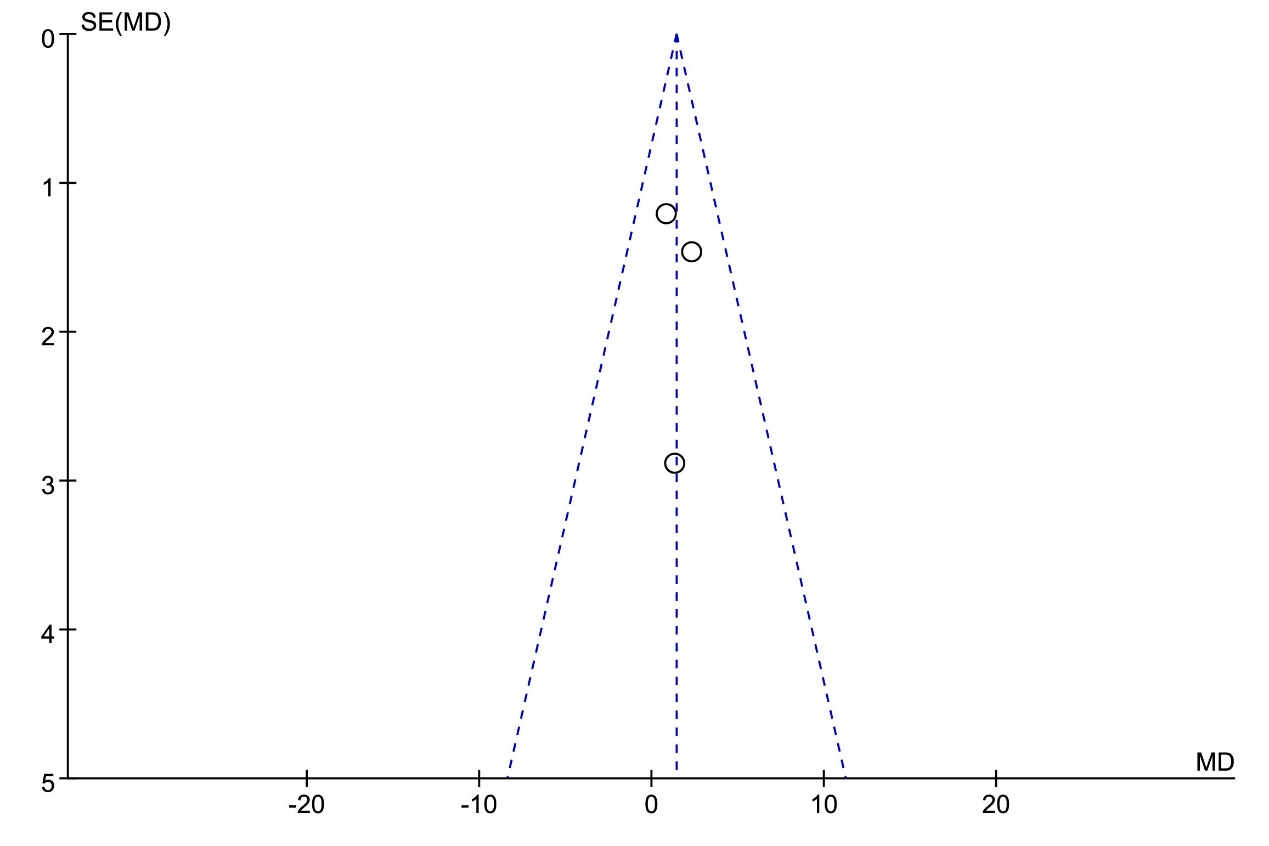

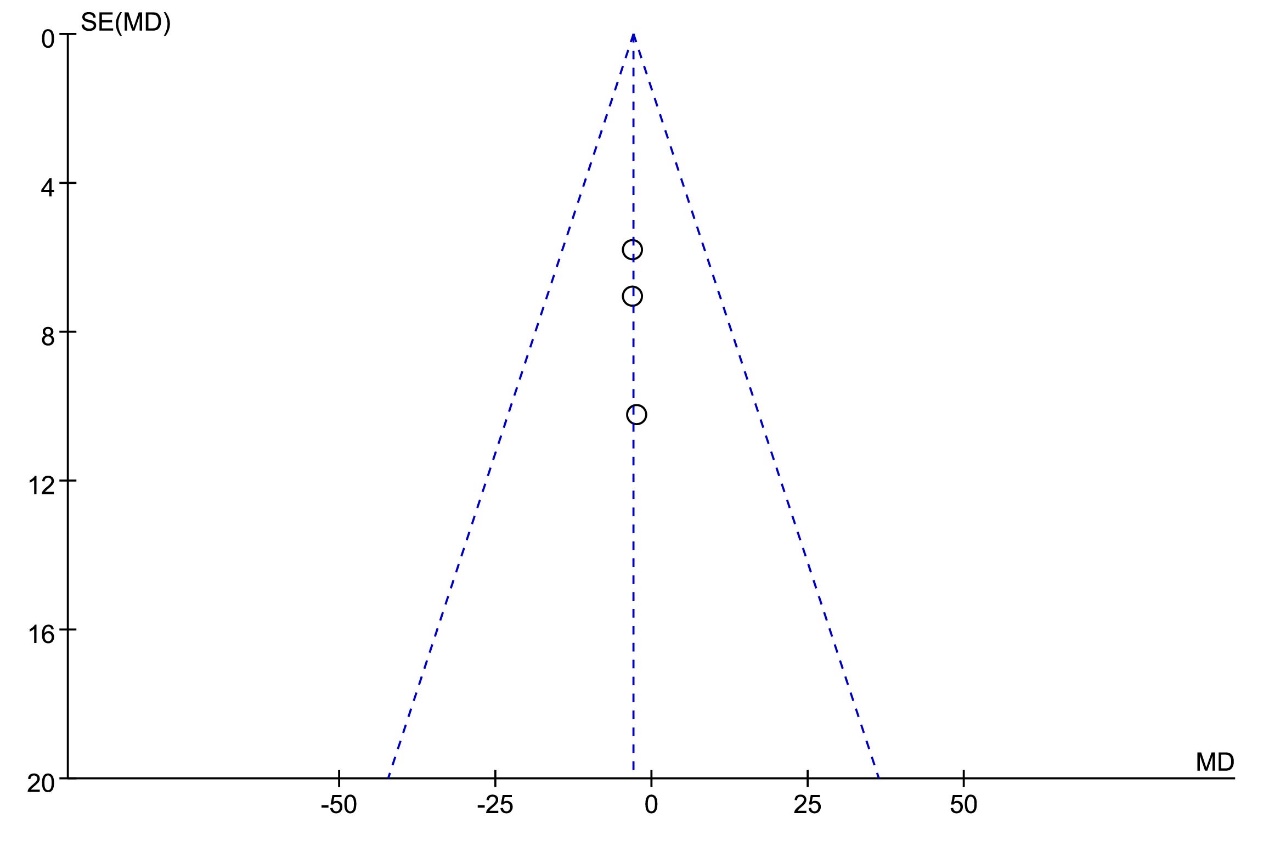
 Supplementary Figure11 Funnel plot: assessing the publication bias of Triglycerides (mg/dL)

Supplementary Figure12 Funnel plot: assessing the publication bias of Glucose (mg/dL)


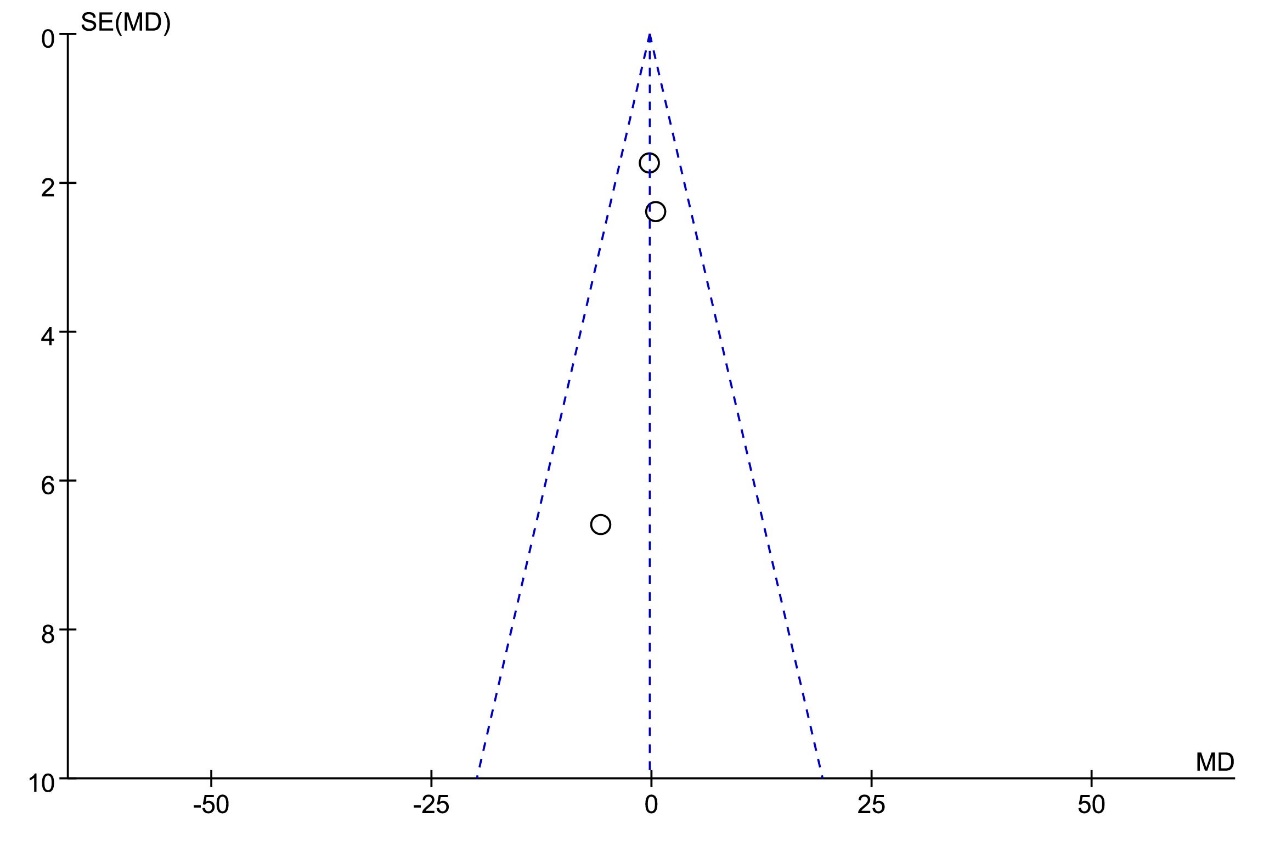
 Supplementary Figure13 Funnel plot: assessing the publication bias of Insulin (mIU/dL)


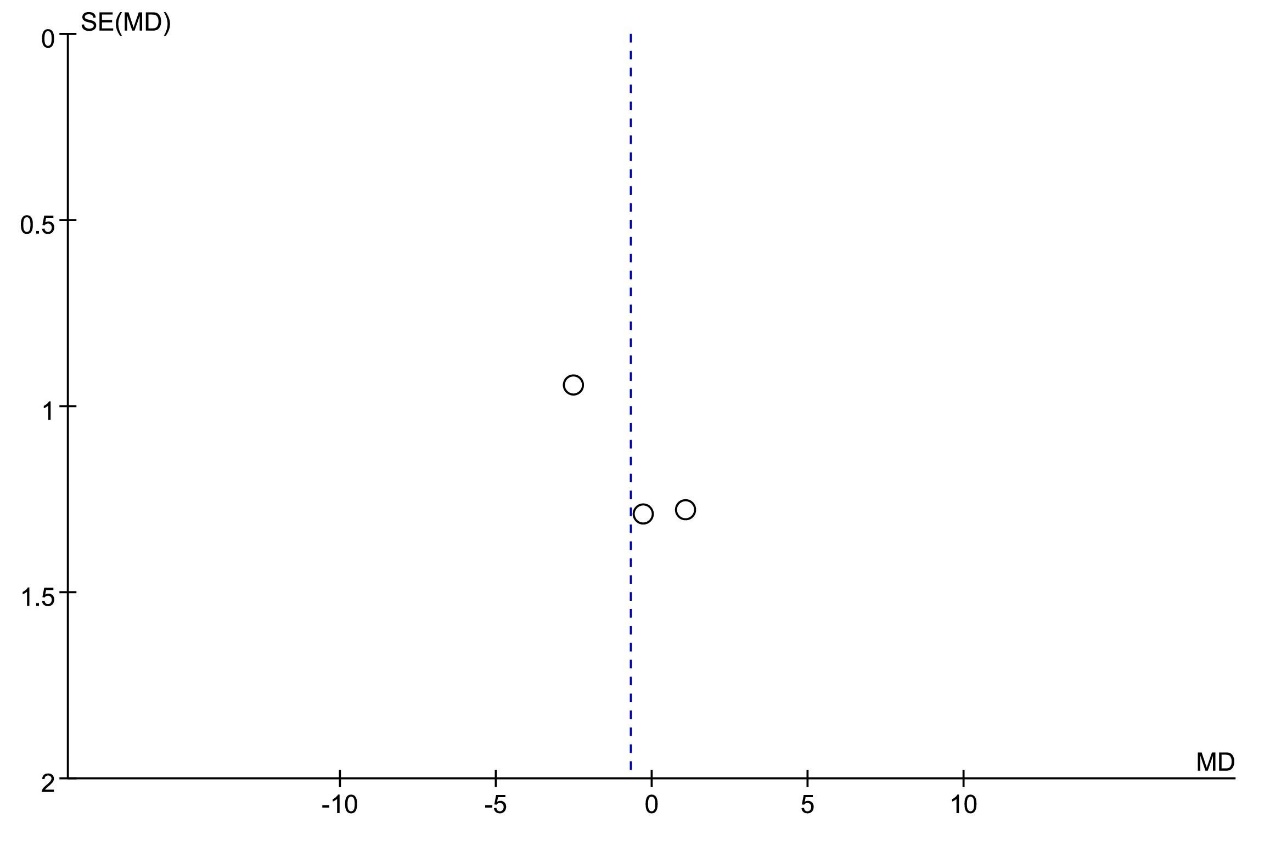
 Supplementary Figure14 Funnel plot: assessing the publication bias of high density lipoprotein (mg/dL)
